# Supplementary material for: Novel insights into nickel import in Staphylococcus aureus: the positive role of free histidine and structural characterization of a new thiazolidine-type nickel chelator
Source: Royal Society of Chemistry journal article supplement (doi:10.1039/c4mt00295d), 2015-01-01
Supplement: c4mt00295d1.pdf [file c4mt00295d1.pdf]

**Supplementary information for**

**Novel insights into nickel import in *Staphylococcus aureus*: positive role of free histidine and structural characterization of a putative thiazolidine-type nickelophore**

Hugo Lebrette<sup>a</sup>, Elise Borezée-Durant<sup>b</sup>, Lydie Martin<sup>a</sup>, Pierre Richaud<sup>c,d,e</sup>, Elisabetta Boeri-Erba<sup>a</sup> and Christine Cavazza<sup>f,g,h\*</sup>

**Table 1:** Data collection and refinement statistics for SaNikA structures.

|                                                      | SaNikA-LB                                                     | SaNikA-M9                                                    | SaNikA-M9/Ni(His) <sub>2</sub>                                | SaNikA-BHI                                                    | SaNikA-CD                                                     | SaNikA-CDΔHis                                                 |
|------------------------------------------------------|---------------------------------------------------------------|--------------------------------------------------------------|---------------------------------------------------------------|---------------------------------------------------------------|---------------------------------------------------------------|---------------------------------------------------------------|
| <b>PDB ID code</b>                                   | 4OFJ                                                          |                                                              | 4XKN                                                          | 4XKP                                                          | 4XKQ                                                          | 4XKR                                                          |
| <b>Data collection</b>                               |                                                               |                                                              |                                                               |                                                               |                                                               |                                                               |
| Beamline                                             | ID29 (ESRF)                                                   | ID29 (ESRF)                                                  | BM30A (ESRF)                                                  | ID29 (ESRF)                                                   | ID14eh4 (ESRF)                                                | ID29 (ESRF)                                                   |
| Wavelength (Å)                                       | 0.98400                                                       | 0.98400                                                      | 0.979621                                                      | 0.97901                                                       | 1.00446                                                       | 0.97625                                                       |
| Space group                                          | <i>P</i> 2 <sub>1</sub> 2 <sub>1</sub> 2 <sub>1</sub>         | <i>P</i> 2 <sub>1</sub>                                      | <i>P</i> 2 <sub>1</sub> 2 <sub>1</sub> 2 <sub>1</sub>         | <i>P</i> 2 <sub>1</sub> 2 <sub>1</sub> 2 <sub>1</sub>         | <i>P</i> 2 <sub>1</sub> 2 <sub>1</sub> 2 <sub>1</sub>         | <i>P</i> 2 <sub>1</sub> 2 <sub>1</sub> 2 <sub>1</sub>         |
| Unit cell parameters                                 | a = 61.90 Å<br>b = 67.72 Å<br>c = 115.65 Å<br>α = β = γ = 90° | a = 124.15 Å<br>b = 118.78 Å<br>c = 164.64 Å<br>β = 105.313° | a = 62.49 Å<br>b = 67.20 Å<br>c = 115.53 Å<br>α = β = γ = 90° | a = 62.34 Å<br>b = 67.24 Å<br>c = 115.21 Å<br>α = β = γ = 90° | a = 62.50 Å<br>b = 67.22 Å<br>c = 116.04 Å<br>α = β = γ = 90° | a = 61.80 Å<br>b = 67.37 Å<br>c = 115.57 Å<br>α = β = γ = 90° |
| Resolution range (Å)                                 | 45.69-1.70<br>[1.80-1.70]                                     | 49.14-4.0<br>[4.10-4.00]                                     | 45.76-1.85<br>[1.95-1.85]                                     | 45.72-1.90<br>[2.00-1.90]                                     | 45.77-1.90<br>[2.00-1.90]                                     | 45.54-1.75<br>[1.80-1.75]                                     |
| <i>R</i> <sub>sym</sub> (%)                          | 7.9 [65.2]                                                    | 21.9 [113.9]                                                 | 11.1 [66.9]                                                   | 12.0 [71.4]                                                   | 11.1 [79.9]                                                   | 7.8 [61.6]                                                    |
| <i>I</i> /σ                                          | 17.04 [4.23]                                                  | 8.17 [1.65]                                                  | 16.89 [2.94]                                                  | 13.13 [2.58]                                                  | 13.60 [3.14]                                                  | 14.6 [3.36]                                                   |
| Completeness (%)                                     | 99.6 [99.4]                                                   | 85.8 [75.6]                                                  | 99.8 [99.2]                                                   | 99.9 [99.9]                                                   | 99.4 [97.7]                                                   | 96.6 [96.4]                                                   |
| Redundancy                                           | 7.2 [7.4]                                                     | 5.7 [5.6]                                                    | 7.0 [6.0]                                                     | 7.3 [7.1]                                                     | 6.2 [6.2]                                                     | 4.4 [4.5]                                                     |
| <i>N</i> <sub>measured</sub>                         | 390110 [61952]                                                | 191505 [11786]                                               | 295789 [36402]                                                | 284125 [38639]                                                | 242226 [33324]                                                | 208978 [17007]                                                |
| <i>N</i> <sub>unique</sub>                           | 53990 [8368]                                                  | 33704 [2088]                                                 | 42182 [6050]                                                  | 38955 [5455]                                                  | 39047 [5392]                                                  | 47766 [3799]                                                  |
| <b>Refinement</b>                                    |                                                               |                                                              |                                                               |                                                               |                                                               |                                                               |
| <i>R</i> factor/ <i>R</i> <sub>free</sub> factor (%) | 14.8/18.5                                                     |                                                              | 15.0/19.2                                                     | 15.8/19.1                                                     | 15.5/19.5                                                     | 17.2/20.5                                                     |
| No. protein atoms                                    | 3780                                                          |                                                              | 3763                                                          | 3802                                                          | 3802                                                          | 3765                                                          |
| No. ligand atoms                                     | 140                                                           |                                                              | 140                                                           | 92                                                            | 98                                                            | 145                                                           |
| No. water molecules                                  | 415                                                           |                                                              | 496                                                           | 415                                                           | 365                                                           | 397                                                           |
| average B-factor (Å <sup>2</sup> )                   | 23.1                                                          |                                                              | 21.2                                                          | 23.8                                                          | 24.7                                                          | 21.4                                                          |
| Rmsd bonds (Å)                                       | 0.015                                                         |                                                              | 0.008                                                         | 0.007                                                         | 0.010                                                         | 0.013                                                         |
| Rmsd angles (°)                                      | 1.56                                                          |                                                              | 1.11                                                          | 1.07                                                          | 1.25                                                          | 1.50                                                          |
| <b>Ramachandran plot:</b>                            |                                                               |                                                              |                                                               |                                                               |                                                               |                                                               |
| Residues in most favorable regions (%)               | 97.5                                                          |                                                              | 97.7                                                          | 97.9                                                          | 97.9                                                          | 96.8                                                          |
| Residues in allowed region (%)                       | 2.5                                                           |                                                              | 2.3                                                           | 2.1                                                           | 2.1                                                           | 2.7                                                           |
| Residues in disallowed region (%)                    | 0                                                             |                                                              | 0                                                             | 0                                                             | 0                                                             | 0.5                                                           |
